# Supplementary material for: Cerebral microsporidiosis manifesting as progressive multifocal leukoencephalopathy in an HIV-infected individual - a case report
Source: Springer Nature journal article supplement (doi:10.1186/1742-6405-11-20), 2014-01-01

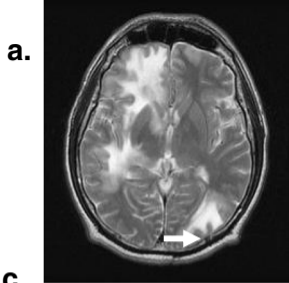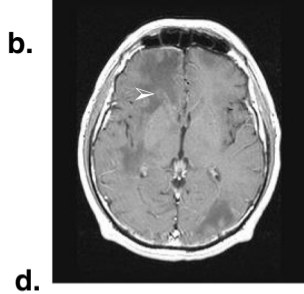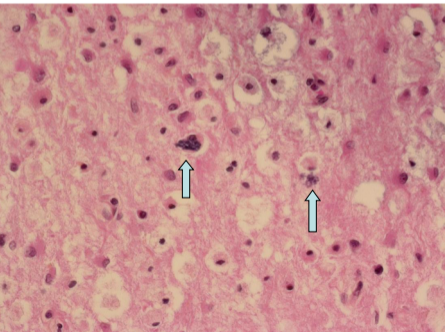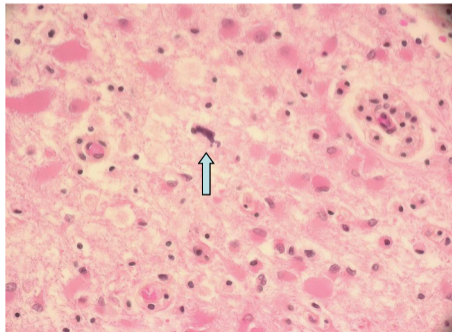

Supplement: 12981_2013_310_MOESM1_ESM.pdf [file 12981_2013_310_MOESM1_ESM.pdf]
